# Supplementary material for: Time-Resolved Transcriptional Profiling of Epithelial Cells Infected by Intracellular Acinetobacter baumannii
Source: PubMed Central journal article supplement (PMC7916935; doi:10.3390/microorganisms9020354), 2021-02-11
Supplement: microorganisms-09-00354-s001.pdf [file microorganisms-09-00354-s001.pdf]

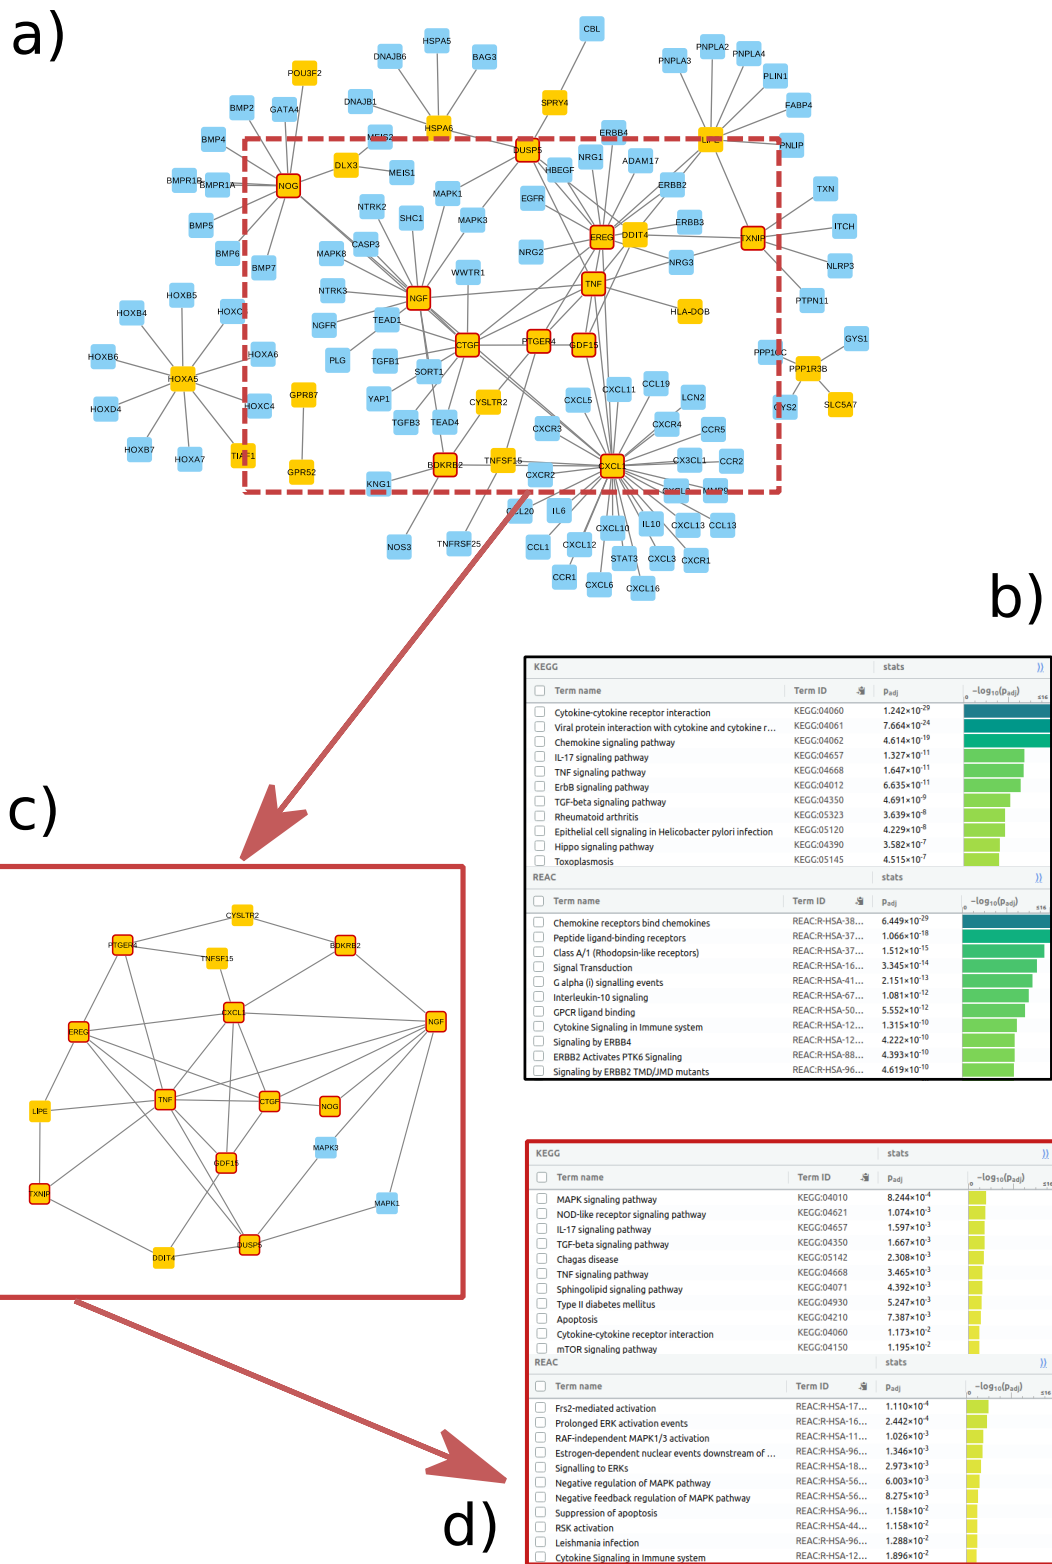

**Figure S1.** Extended Protein-Protein Interaction (PPI) network of our sorted DEGs at 4 h post-infection. Network diagrams are useful for visualizing hub proteins and their immediate connections. (a) Extended network, containing all first neighbors of detected DEGs. (b) GO terms associated to the extended network. (c) Densely packed clusters identified in the network and (d) the GO terms associated to these clusters.



Correlation with *Yersinia enterocolitica*

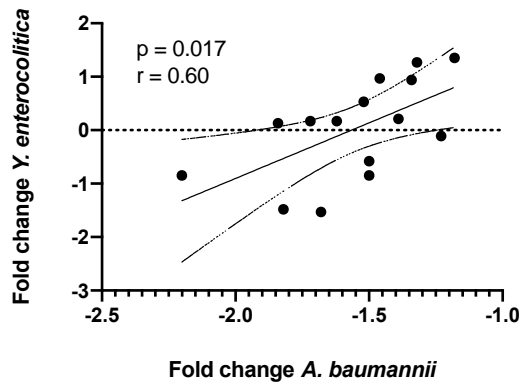

Correlation with *Pseudomonas aeruginosa*

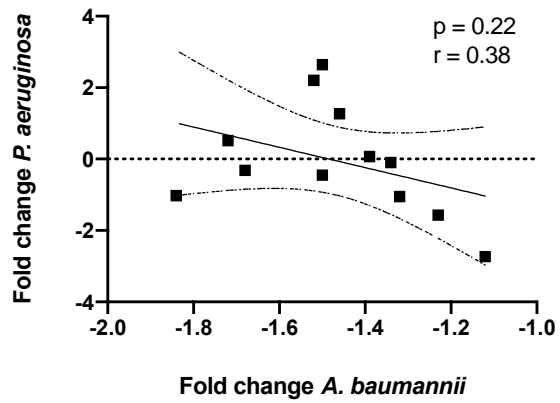

**Figure S3.** Fold change correlation of DEGs identified during *A. baumannii* infection with *Y. enterocolitica* (intracellular pathogen) and *P. aeruginosa* (extracellular pathogen). Fold change values for *Y. enterocolitica* and *P. aeruginosa* were obtained from the DualSeqDB database (<http://www.tartaglialab.com/dualseq/>) and *A. baumannii* were obtained from this study.
